# Supplementary material
Source: HighWire-hosted journal article supplement (http://cmajopen.ca/highwire/filestream/80907/field_highwire_adjunct_files/0/2015-0005_original_submission.pdf)
Supplement: 2015-0005_original_submission.pdf [file 2015-0005_original_submission.pdf]

## Identifying Palliative Care Physicians using Health Administrative Data

Lisa Barbera MD<sup>1,2</sup>, Jeremiah Hwee MSc<sup>2\*</sup>, Christopher Klinger PhD<sup>4</sup>, Nathaniel Jembere MSc<sup>2</sup>, Hsien Seow PhD<sup>2,3</sup>, Jose Pereira MBChB<sup>4,5</sup>

<sup>1</sup>Department of Radiation Oncology, University of Toronto, Toronto, Ontario,

<sup>2</sup>Institute for Clinical Evaluative Sciences, Toronto, Ontario,

<sup>3</sup>Department of Oncology, McMaster University, Hamilton, Ontario,

<sup>4</sup>Department of Medicine, University of Ottawa, Ottawa, Ontario,

<sup>5</sup>Bruyère Research Institute, Ottawa, Ontario

\*at the time of the study, currently PhD Student at University of Toronto

**Funding source:** This study was conducted with the support of the Canadian Centre for Applied Research in Cancer Control.

**Competing Interests:** Dr. Pereira was the Provincial Lead for Palliative Care at Cancer Care Ontario when the analysis was being completed.

### Corresponding author:

Lisa Barbera  
Odette Cancer Centre  
2075 Bayview Avenue  
Toronto, Ontario  
M4N 3M5

(p): 416-480-4974

(f): 416-480-6002

(e): [lisa.barbera@sunnybrook.ca](mailto:lisa.barbera@sunnybrook.ca)

**Abstract word count:** 248 (250 allowed)

**Manuscript word count:** 2373 (2500 allowed)

**ABSTRACT**

Background: Very little is known about the palliative care physician workforce in Canada or Ontario. The objective of this study was to develop a method of identifying palliative care physicians using administrative data and to validate it against a gold standard. This algorithm was then applied to all family physicians in Ontario to describe and quantify those identified by the algorithm.

Methods: We used the Ontario Health Insurance Plan (2008-2011) to identify palliative care related claims and divided this by all claims made to derive each physician's proportion of palliative care claims. We identified a data driven cut-off where physicians with a proportion of palliative care claims above the cut-off were defined as palliative care physicians. We validated the cut off against a reference sample of physicians who self-identified as doing "mostly" palliative care in a study specific survey. We then applied this algorithm back to the entire population of physicians.

Results: We empirically selected 10% as the cut-off. This had exceptional specificity and PPV and adequate sensitivity, 97.8%, 90.5% and 76.0%, respectively when compared to the reference sample (n=118). When applied back to all family physicians in Ontario, the algorithm identified 267 physicians as practicing mostly palliative care. Of these, 49% were women and 53% work part time and 96% practiced in urban locations.

Interpretation: We have developed a method to readily identify and quantify physicians who practice palliative care in Ontario. Such a tool has numerous applications for both health service planners and researchers.

## INTRODUCTION

There is increasing recognition of the need to improve access to palliative care for patients with progressive life limiting illnesses. Practice-based models and research data support the need for early palliative care involvement[1,2]. Increasing cancer incidence, an aging population and increasing recognition for palliative care in non-cancer diagnoses are all drivers of the need for palliative care.

Physicians, as part of inter-professional teams, play a crucial role in the provision of palliative care. An adequate palliative care physician workforce with the necessary training and skill to manage complex cases and lead education, research, quality improvement and health services management is required[3,4]. However, other physicians including family physicians and specialists also have an important role to play, particularly providing generalist-level palliative care. This generalist approach is increasingly referred to as the “palliative care approach”[5].

Very little is known about the physician workforce providing palliative care in Canada or Ontario. The Canadian Partnership for Cancer Control report on the Cancer Workforce[6] describes a gap in human resources research and a need to better understand the current and future supply of physicians to provide cancer care, including palliative care. The Canadian data that is currently available is collected via surveys or interviews which are time consuming and subject to errors or bias[7-9]. A single US study identified on this issue also had difficulties identifying palliative care physicians to estimate the workforce[10]. Estimates from England vary considerably depending on the source[11].

1  
2  
3 The absence, until recently, of formal recognition of palliative care as a specialty  
4 or sub-specialty in Canada[12] has complicated the identification of physicians with  
5 advanced training and expertise in palliative care. Moreover, a lack of formal  
6 designation by the health ministries or regulatory bodies amplifies the challenge. Being  
7 able to identify palliative care physicians using administrative data would provide a rapid  
8 means of quantifying the palliative care physician workforce for policy purposes and  
9 provide a tool for other research studies.  
10  
11  
12  
13  
14  
15  
16  
17  
18  
19

20 The objective of this study was to develop a method of identifying physicians who  
21 provide palliative care using administrative health data and to validate it against a gold  
22 standard sample. Secondly, this algorithm was then applied to the all physicians in  
23 Ontario to describe and quantify those identified by the algorithm.  
24  
25  
26  
27  
28  
29  
30

## 31 **METHODS**

### 32 Study Design

33  
34  
35  
36  
37 This study used administrative health care data to empirically create an algorithm  
38 for identifying physicians providing palliative care. This algorithm was then validated and  
39 applied to the entire population of physicians. This study was approved by the  
40 Research Ethics Board of Sunnybrook Health Sciences Centre. Standard protocols  
41 were followed to preserve physician privacy and confidentiality. All databases are  
42 housed at the Institute for Clinical Evaluative Sciences in Ontario.  
43  
44  
45  
46  
47  
48  
49  
50

### 51 Study Setting

52  
53  
54  
55  
56  
57  
58  
59  
60

1  
2  
3 The study setting was the province of Ontario, Canada whose population  
4 exceeds 13 million people. All physician care is provided by a government funded single  
5 payer health plan. Any patient who is felt to have need can receive palliative care  
6 regardless of whether they are still receiving anti-cancer therapy. Palliative care is  
7 typically provided by family physicians who have developed palliative care within their  
8 scope of practice (to greater or lesser degrees). For some, palliative care constitutes all  
9 or a major part of their practices. An unknown number have completed advanced  
10 training in palliative care, including an additional year of training with an accredited  
11 program.  
12  
13  
14  
15  
16  
17  
18  
19  
20  
21  
22  
23  
24

#### 25 Data Sources and Definitions

26  
27  
28 The Ontario Health Insurance Plan (OHIP) claims include the service date,  
29 service type and a unique provider number. Virtually all health services and physician  
30 visits are captured in this data. The OHIP Corporate Provider Database and the Ontario  
31 Physician Human Resource Data Centre database capture physician demographic and  
32 practice related characteristics. These administrative databases were linked through  
33 each physician's unique provider number. A physicians' full time equivalent (FTE) status  
34 was calculated by using total physician payments from all sources and assigning an  
35 FTE of 1.00 to physician who fell between 40<sup>th</sup> and 60<sup>th</sup> percentiles of their  
36 specialty[13,14].  
37  
38  
39  
40  
41  
42  
43  
44  
45  
46  
47  
48  
49

50 We reviewed physician OHIP claims from January 01, 2008 to December 31,  
51 2011. In order to identify palliative care physicians, we used a collection of palliative  
52 care specific feecodes within OHIP. These feecodes were identified by consulting the  
53  
54  
55  
56  
57  
58  
59  
60

1  
2  
3 Ontario Ministry of Health and Long Term Care Schedule of Benefits. This list of codes  
4 was vetted by a practicing palliative care physician to ensure it was complete (JP).  
5  
6

7  
8 Feecodes with few to no claims were removed (Appendix A).  
9

### 10 11 Algorithm Definition 12

13  
14 The algorithm for identifying palliative care physicians from administrative data  
15 was determined by evaluating each physician's proportion of palliative care claims. This  
16 was defined as the number of palliative care claims (numerator) over all claims made by  
17 the physician (denominator). We chose to use a proportion because it better  
18 characterizes practice patterns of palliative care physicians. Using absolute counts of  
19 palliative care claims would underestimate the number of palliative care physicians, as  
20 certain physicians are busier than others. Since the fee paid for any of the individual  
21 claims was within a narrow range, we did not use the proportion of billings from  
22 palliative care codes (by contrast, a surgeon would have procedure claims that are  
23 worth much more than a clinic visit). We evaluated the distribution of the data and  
24 empirically identified a threshold cut-off.  
25  
26  
27  
28  
29  
30  
31  
32  
33  
34  
35  
36  
37  
38  
39  
40

### 41 Validation Sample 42

43  
44 A short survey was created asking physicians to self-identify as physicians that  
45 practice mostly palliative care versus occasionally or rarely and their FTE status. The  
46 Ontario Medical Association(OMA)[15] was then consulted to identify and contact all  
47 family physicians, general practitioners, and physicians with special interests in  
48 palliative care in Ontario. Physicians from across Ontario were surveyed from March to  
49  
50  
51  
52  
53  
54  
55  
56  
57  
58  
59  
60

1  
2  
3 November 2013. After the initial contact with physicians, they were given eight weeks to  
4  
5 respond. The respondents to the survey were used as the reference standard.  
6  
7

#### 8 9 Algorithm validation

10  
11  
12 Once the cut point was determined from the claims data, we extracted all claims  
13  
14 data for the validation sample of physicians. We compared the proportion of palliative  
15  
16 care claims billed by each physician in the reference sample to their self reported  
17  
18 amount of palliative care from the survey (gold standard) to determine the performance  
19  
20 of the algorithm. Those physicians that self-identified as practicing mostly palliative care  
21  
22 were considered palliative care physicians, and those that indicated that they  
23  
24 occasionally or rarely practice palliative care were considered non-palliative care  
25  
26 physicians. If the algorithm worked perfectly, every physician with the percentage of  
27  
28 palliative care claims above the cut off would also have self reported as practicing  
29  
30 mostly palliative care and every physician below the cut off would have self reported as  
31  
32 practicing palliative care only occasionally or rarely. We tested different cut offs to  
33  
34 maximize sensitivity, specificity and positive predictive value (PPV). A binomial  
35  
36 distribution was used to calculate 95% confidence intervals[16].  
37  
38  
39  
40  
41  
42

#### 43 44 Algorithm application

45  
46  
47 Once the cut point was validated, the algorithm was applied to claims from all  
48  
49 family doctors/general practitioners in the province. We then used administrative data to  
50  
51 quantify and describe these doctors. When the algorithm was applied to the entire  
52  
53 province the number of physicians identified was felt to be rather large. As a result, a  
54  
55 secondary cut point was selected and data is presented for both cut points.  
56  
57  
58  
59  
60

## RESULTS

### Primary Data Collection

A total of 125 physicians responded to the survey, and 7 were excluded because they could not be linked to the databases or had no recorded billings within the study period. A final cohort of 118 physicians was used in the analysis for the validation. A description of these physicians is provided in Table 1.

### Validation of the Administrative Data Algorithm

All physician specialities (n=44) were evaluated for palliative care specific feecodes. The majority of palliative care claims (82%) were billed by general practitioners/ family practitioners, including family practitioners that also practice in the emergency department (Table 2). For this reason we restricted our analysis to family physicians only, recognizing that there are some palliative care physicians amongst specialists. Medical oncology billed the next largest proportion at 6%, most commonly using a weekly case management code. The other 41 specialties billed the palliative care codes infrequently. Counselling type codes were used most commonly among the family physicians/GPs.

We examined the distribution of the proportion of palliative care claims over the total claims and empirically selected 10% as the cut-off (data not shown). Performance of the 10% cut point and 3 additional different cut points are presented in Table 3. Having billed at least 10% of claims as palliative care claims was shown to have optimal performance with exceptional specificity and PPV and adequate sensitivity, 97.8%, 90.5% and 76.0%, respectively. Using a lower threshold of 5% and 3%, sacrificed

1  
2  
3 specificity and PPV while not improving sensitivity. A higher threshold of 50% greatly  
4  
5 reduced the sensitivity with marginal increases to the specificity and PPV. A physician's  
6  
7 full time equivalent status did not affect the algorithms (data not shown).  
8  
9

10  
11 Using the  $\geq 10\%$  algorithm, we identified 276 physicians in Ontario that provided  
12  
13 palliative care. Palliative care physicians were more likely to be female, more likely to  
14  
15 practice in an urban setting and more likely to work part time compared to non-palliative  
16  
17 care physicians (Table 4). When we stratified the palliative care physicians, those with  
18  
19  $\geq 50\%$  of their claims being palliative care (n=109) were younger compared to physicians  
20  
21 with 10% to  $< 50\%$  of their claims being palliative care claims. There were more women  
22  
23 in the  $\geq 50\%$  group but this was not statistically significant.  
24  
25  
26  
27

28  
29 For physicians not meeting the criteria, only 0.5% of their claims were palliative  
30  
31 care; whereas 21.2% and 82.8% of claims were for palliative care in the groups  
32  
33 categorized by the 10% to  $< 50\%$  and  $\geq 50\%$  cut points respectively. There were  
34  
35 approximately 3700 family physicians (3582-4147 depending on the year, about 40%)  
36  
37 who did not bill a single palliative care code.  
38  
39  
40

41  
42 Physicians in the  $< 10\%$ , 10 to  $< 50\%$  and  $\geq 50\%$  groups relied on different  
43  
44 feecodes. When the physicians in the  $< 10\%$  group did bill for palliative care, they more  
45  
46 commonly used house call codes or the weekly supervision code. By contrast, the  
47  
48 physicians in the  $\geq 50\%$  group primarily billed weekly supervision or counselling codes.  
49  
50

## 51 52 **INTERPRETATION**

53  
54  
55 We successfully developed an algorithm using billing claims to identify physicians  
56  
57 practicing mostly palliative care with excellent specificity, an excellent positive predictive  
58  
59  
60

1  
2  
3 value and modest sensitivity against the gold standard sample using a data driven  
4  
5 threshold of 10% of claims being palliative care claims. Using this algorithm, we  
6  
7 identified 276 physicians. Of these, 109 billed palliative care claims more than 50% of  
8  
9 the time.  
10  
11

12  
13 In spite of the high specificity and acceptable sensitivity of the 10% cut-off, the  
14  
15 number of physicians identified across the province with this definition (n=276)  
16  
17 appeared high to the authors. This may have occurred because the survey sent to  
18  
19 ascertain palliative care practices was not specific enough, i.e. that “mostly” palliative  
20  
21 care was not more specifically defined. It may be that the investigating team’s  
22  
23 perspective under-appreciates the actual number of physicians practicing an  
24  
25 intermediate amount of palliative care.  
26  
27  
28  
29  
30

31 The reporting of 3 groups rather than two may deviate from the original intent but  
32  
33 does provide additional insight that is useful from a policy perspective. For example,  
34  
35 physicians in the >50% group are different from those in the 10-50% group. They are  
36  
37 younger and clearly clustered in certain regions. By contrast, regardless of the cut-  
38  
39 point, the physicians who are doing palliative care practice primarily in urban settings.  
40  
41 Furthermore, it is clear that physicians billing more than 50% are practicing palliative  
42  
43 care almost exclusively. The intermediate group who bill 10-50% likely run a regular  
44  
45 family practice as well. These different groups reflect different models of providing  
46  
47 palliative care. Care given in a palliative approach need not be given by specialists  
48  
49 whose practice is exclusively in this area[5]. A recent study by Seow et al showed that  
50  
51 different community based team models in Ontario reduced hospital admissions and ED  
52  
53 visits provided certain key elements are present[17].  
54  
55  
56  
57  
58  
59  
60

1  
2  
3 Perhaps most striking is that approximately 40% of the family physicians in the  
4 province did not bill a single palliative care code. If the intention is to increase primary  
5 palliative care capacity this may represent a target group and/or metric. For example, if  
6 policy measures are implemented to increase primary palliative care capacity, the  
7 patterns of billing for these physicians could be followed over time for change.  
8  
9  
10  
11  
12  
13  
14

15  
16 This algorithm does provide a tool to evaluate the number and distribution of  
17 palliative care physicians, to estimate the number of patients for whom they provide  
18 care and to use in forecasting estimates of human resource need. MD/population ratios  
19 from the UK[11] or Australia[18] range from 0.8 to 1.5 palliative care *specialists* per 100  
20 000 population. Whether these estimates are applicable to Ontario is not known. In the  
21 US, Australia and England, shortages are feared[10,11,18]. An in depth examination of  
22 this issue for Ontario is beyond the scope of this paper, but the authors hope the  
23 algorithm is a significant step towards finding the answer.  
24  
25  
26  
27  
28  
29  
30  
31  
32  
33  
34  
35

36 The strength of this paper is that it begins to address a recognized gap in our  
37 knowledge of human health resources in palliative care in Ontario. While the specific  
38 feecodes or cut-off used in this study may not be generalizable to other settings, the  
39 methodological approach could be readily applied in other jurisdictions.  
40  
41  
42  
43  
44  
45

46 A limitation of the study is that the billing system is unable to accurately capture  
47 all possible types of palliative care activity. The types of claims used for the algorithm  
48 were specifically related to the provision of palliative care; however, it is common for  
49 palliative care physicians to bill other types of claims which are more generic, even if the  
50 nature of the care provided was still palliative. As such, the algorithm is not able to  
51  
52  
53  
54  
55  
56  
57  
58  
59  
60

1  
2  
3 quantify how much palliative care patients are getting and no physician would have  
4  
5 100% of their claims all specifically related to palliative care. Although specialists and  
6  
7 other family doctors may be providing palliative care and billing with other feecodes, the  
8  
9 lack of use of the specific codes indicates this is not the main focus of their practice.  
10  
11

12  
13 We have developed a method to readily identify and quantify physicians who  
14  
15 practice palliative care in Ontario. Such a tool has numerous applications for both health  
16  
17 service planners and researchers. Until there is a more rigorous definition of “palliative  
18  
19 care physician” paired with a robust identifier, this is the most useful tool available.  
20  
21  
22  
23  
24  
25  
26  
27  
28  
29  
30  
31  
32  
33  
34  
35  
36  
37  
38  
39  
40  
41  
42  
43  
44  
45  
46  
47  
48  
49  
50  
51  
52  
53  
54  
55  
56  
57  
58  
59  
60

1  
2  
3 Acknowledgements: This study was conducted with the support of the Canadian Centre  
4 for Applied Research in Cancer Control. This study was supported by the Institute for  
5 Clinical Evaluative Sciences (ICES), which is funded by an annual grant from the  
6 Ontario Ministry of Health and Long-Term Care (MOHLTC). The opinions, results and  
7 conclusions reported in this paper are those of the authors and are independent from  
8 the funding sources. No endorsement by ICES or the MOHLTC is intended or should be  
9 inferred. The authors would like to acknowledge all the survey respondents whose  
10 replies facilitated this work.  
11  
12  
13  
14  
15  
16  
17  
18  
19  
20  
21

22  
23 An abstract of this work was presented at the Canadian Centre for Applied Research in  
24 Cancer Control's Annual Scientific Meeting in Toronto, May, 2014.  
25  
26  
27  
28  
29  
30  
31  
32  
33  
34  
35  
36  
37  
38  
39  
40  
41  
42  
43  
44  
45  
46  
47  
48  
49  
50  
51  
52  
53  
54  
55  
56  
57  
58  
59  
60

## References

1. Temel JS, Greer JA, Muzikansky A, et al. Early palliative care for patients with metastatic non-small-cell lung cancer. *N Engl J Med* 2010;363:733-42.
2. Ferris FD, Balfour HM, Bowen K, Farely J, Hardwick M, Lamontagne C, et al. A Model to Guide Hospice Palliative Care: Based on National Principles and Norms of Practice. Ottawa: Canadian Hospice Palliative Care Association; 2002.
3. Shadd J. Should palliative care be a specialty?: yes. *Can Fam Physician* 2008;54:840, 842, 844, 846.
4. von Gunten CF, Lupu D. Recognizing palliative medicine as a subspecialty: what does it mean for oncology? *J Support Oncol* 2004;2:166-74.
5. Shadd JD, Burge F, Stajduhar KI, Cohen SR, Kelley ML, Pesut B. Defining and measuring a palliative approach in primary care. *Can Fam Physician* 2013;59:1149-50.
6. Canadian Partnership Against Cancer. The Canadian workforce scoping study. Public Health Agency of Canada; 2010.
7. Slocum-Gori S, Hemsworth D, Chan WW, Carson A, Kazanjian A. Understanding Compassion Satisfaction, Compassion Fatigue and Burnout: A survey of the hospice palliative care workforce. *Palliat Med* 2011;

- 1  
2  
3 8. Towns K, Dougherty E, Kevork N, et al. Availability of services in Ontario hospices  
4 and hospitals providing inpatient palliative care. *J Palliat Med* 2012;15:527-34.  
5  
6  
7
- 8  
9 9. Sussman J, Barbera L, Bainbridge D, et al. Health system characteristics of quality  
10 care delivery: a comparative case study examination of palliative care for cancer  
11 patients in four regions in Ontario, Canada. *Palliat Med* 2012;26:322-35.  
12  
13  
14
- 15  
16  
17 10. Lupu D. Estimate of current hospice and palliative medicine physician workforce  
18 shortage. *J Pain Symptom Manage* 2010;40:899-911.  
19  
20  
21
- 22  
23 11. Centre for Workforce Intelligence. Medical Specialty Workforce Factsheet:  
24 Palliative Medicine. [www.cfw.org.uk/publications/palliative-medicine-cfw-medical-](http://www.cfw.org.uk/publications/palliative-medicine-cfw-medical-fact-sheet-and-summary-sheet-august-2010/attachment.pdf)  
25 [fact-sheet-and-summary-sheet-august-2010/attachment.pdf](http://www.cfw.org.uk/publications/palliative-medicine-cfw-medical-fact-sheet-and-summary-sheet-august-2010/attachment.pdf). Updated  
26  
27  
28  
29  
30 2010. Accessed September 15, 2014  
31  
32
- 33  
34 12. Monette M. Palliative care subspecialty in the offing. *CMAJ* 2012;184:E653-E654.  
35  
36
- 37  
38 13. Stukel TA, Glazier RH, Schultz SE, et al. Multispecialty physician networks in  
39 Ontario. *Open Med* 2013;7:e40-e55.  
40  
41
- 42  
43 14. Henry DA, Schultz SE, Glazier RH, Bhatia RS, Dhalla IA, Laupacis A. Payments to  
44 Ontario physicians from Ministry of Health and Long-Term Care sources, 1992/93  
45 to 2009/10. Toronto: Institute for Clinical Evaluative Sciences; 2012.  
46  
47  
48
- 49  
50  
51 15. Ontario Medical Association. About the Ontario Medical Association.  
52  
53 <https://www.oma.org/About/Pages/default.aspx>. Updated 2014. Accessed June 3,  
54  
55  
56 2014  
57  
58  
59  
60

- 1  
2  
3 16. Newcombe RG. Two-sided confidence intervals for the single proportion:  
4 comparison of seven methods. *Stat Med* 1998;17:857-72.  
5  
6  
7  
8  
9 17. Seow H, Brazil K, Sussman J, et al. Impact of community based, specialist  
10 palliative care teams on hospitalisations and emergency department visits late in  
11 life and hospital deaths: a pooled analysis. *BMJ* 2014;348:g3496.  
12  
13  
14  
15  
16  
17 18. Health and Community Services Committee Inquiry into palliative care services  
18 and home and community care services in Queensland. Australia: The Royal  
19 Australasian College of Physicians; 2014.  
20  
21  
22  
23  
24  
25  
26  
27  
28  
29  
30  
31  
32  
33  
34  
35  
36  
37  
38  
39  
40  
41  
42  
43  
44  
45  
46  
47  
48  
49  
50  
51  
52  
53  
54  
55  
56  
57  
58  
59  
60

Table 1 Characteristics of physicians used to validate the palliative care algorithm  
(n=118)

| Characteristic                                                      |                |
|---------------------------------------------------------------------|----------------|
| Age, mean (SD)                                                      | 47.7 (10.2)    |
| Sex, n (%)                                                          |                |
| Female                                                              | 65 (55.1%)     |
| Male                                                                | 52 (44.1%)     |
| Missing                                                             | ≤ 5 physicians |
| Practice location, n (%)                                            |                |
| Rural                                                               | 18 (15.3%)     |
| Urban                                                               | 88 (74.6%)     |
| Missing                                                             | 12 (10.2%)     |
| Practice location by health region, n (%)                           |                |
| 1                                                                   | ≤ 5 physicians |
| 2                                                                   | 8 (6.8%)       |
| 3                                                                   | ≤ 5 physicians |
| 4                                                                   | 16 (13.6%)     |
| 5                                                                   | ≤ 5 physicians |
| 6                                                                   | ≤ 5 physicians |
| 7                                                                   | 9 (7.6%)       |
| 8                                                                   | ≤ 5 physicians |
| 9                                                                   | 12 (10.2%)     |
| 10                                                                  | 6 (5.1%)       |
| 11                                                                  | 25 (21.2%)     |
| 12                                                                  | ≤ 5 physicians |
| 13                                                                  | 6 (5.1%)       |
| 14                                                                  | ≤ 5 physicians |
| Missing                                                             | 12 (10.2%)     |
| Full time equivalent, (%) <sup>1</sup>                              |                |
| 1 or more                                                           | 95 (80.5%)     |
| Less than 1                                                         | 19 (16.1%)     |
| Missing                                                             | ≤ 5 physicians |
| Proportion of palliative care claims over total claims <sup>2</sup> | 12.5%          |

Age and practice location as of March 31, 2011.

<sup>1</sup>FTE status based on self report, all other variables from administrative data

<sup>2</sup>Proportion of palliative care claims from calendar years 2008 to 2011.

Table 2. Distribution of specific feecodes by physician specialty.

| Feecode | Description                                                                  | GP/FP            |          |       | Medical Oncology |          |       | All other specialties |          |       | Total            |          |
|---------|------------------------------------------------------------------------------|------------------|----------|-------|------------------|----------|-------|-----------------------|----------|-------|------------------|----------|
|         |                                                                              | Number of claims | Column % | Row % | Number of claims | Column % | Row % | Number of claims      | Column % | Row % | Number of claims | Column % |
| A901    | GP/FP house call                                                             | 16,197           | 1%       | 97%   | 2                | 0%       | 0%    | 429                   | 0%       | 3%    | 16,628           | 0%       |
| A902    | Pronouncement of death in home                                               | 4,758            | 0%       | 95%   | 2                | 0%       | 0%    | 241                   | 0%       | 5%    | 5,001            | 0%       |
| A945    | GP/FP special palliative care consultation                                   | 47,298           | 2%       | 91%   | 523              | 0%       | 1%    | 3,958                 | 1%       | 8%    | 51,779           | 2%       |
| B966    | Travel premium-palliative care home visit                                    | 53,467           | 2%       | 94%   | 6                | 0%       | 0%    | 3,504                 | 1%       | 6%    | 56,977           | 2%       |
| B990    | Special visit to patient's home, weekday/daytime                             | 298,642          | 11%      | 94%   | 71               | 0%       | 0%    | 18,072                | 5%       | 6%    | 316,785          | 9%       |
| B992    | Special visit to patient's home, weekday/daytime, sacrifice office hours     | 23,527           | 1%       | 98%   | 2                | 0%       | 0%    | 453                   | 0%       | 2%    | 23,982           | 1%       |
| B994    | Special visit to patient's home, non-elective, evening hours                 | 181,541          | 7%       | 97%   | 57               | 0%       | 0%    | 6,463                 | 2%       | 3%    | 188,061          | 6%       |
| B996    | Special visit to patient's home, night time (first patient)                  | 8,226            | 0%       | 91%   | 7                | 0%       | 0%    | 769                   | 0%       | 9%    | 9,002            | 0%       |
| B997    | Special visit to patient's home, palliative care, days, evenings (from 2009) | 461              | 0%       | 94%   | 4                | 0%       | 1%    | 27                    | 0%       | 5%    | 492              | 0%       |
| B998    | Special visit to patient's home, palliative care, days, evenings (from 2005) | 146,806          | 5%       | 95%   | 31               | 0%       | 0%    | 7,342                 | 2%       | 5%    | 154,179          | 5%       |
| C882    | GP/FP terminal care in hospital                                              | 436,998          | 16%      | 96%   | 330              | 0%       | 0%    | 19,573                | 5%       | 4%    | 456,901          | 14%      |
| C945    | Special palliative care consultation, hospital in patient                    | 41,208           | 1%       | 90%   | 148              | 0%       | 0%    | 4,570                 | 1%       | 10%   | 45,926           | 1%       |
| C982    | Palliative care, hospital in patient                                         | 4                | 0%       | 0%    | 4,013            | 2%       | 12%   | 29,688                | 8%       | 88%   | 33,705           | 1%       |
| E083    | Subsequent visit as most responsible physician                               | 68,524           | 2%       | 89%   | 255              | 0%       | 0%    | 7,918                 | 2%       | 10%   | 76,697           | 2%       |
| K015    | Counseling a relative on behalf of a patient                                 | 73,267           | 3%       | 33%   | 23,632           | 11%      | 11%   | 124,872               | 32%      | 56%   | 221,771          | 7%       |
| K023    | Palliative care support to individual, 30 min                                | 777,085          | 28%      | 87%   | 29,465           | 14%      | 3%    | 82,098                | 21%      | 9%    | 888,648          | 26%      |
| K700    | Palliative Care Out-patient Case Conference                                  | 1,204            | 0%       | 93%   | 85               | 0%       | 7%    | 12                    | 0%       | 1%    | 1,301            | 0%       |
| W872    | Terminal care in nursing home, GP/FP practice                                | 6,487            | 0%       | 99%   | 0                | 0%       | 0%    | 94                    | 0%       | 1%    | 6,581            | 0%       |
| W882    | Terminal care in chronic care hospital, GP/FP                                | 69,694           | 2%       | 92%   | 2                | 0%       | 0%    | 6,292                 | 2%       | 8%    | 75,988           | 2%       |
| G511    | Telephone management of palliative care at home                              | 15,849           | 1%       | 92%   | 331              | 0%       | 2%    | 1,112                 | 0%       | 6%    | 17,292           | 1%       |
| G512    | Weekly palliative care case management                                       | 519,220          | 19%      | 71%   | 147,755          | 71%      | 20%   | 68,889                | 18%      | 9%    | 735,864          | 22%      |
| Total   |                                                                              | 2,790,463        |          | 82%   | 206,721          |          | 6%    | 386,376               |          | 11%   | 3,383,560        |          |

GP/FP: general practice/family practice. Physicians in the GP/FP column were used to create the algorithm. Medical oncologists and other specialists are shown for comparison in this table, but are not included in algorithm.

Column % allows within group comparison. Row % allows between group comparison.

Table 3. Validation of administrative data algorithms against the physician survey data (n=118)

| Algorithm description           | Sensitivity<br>(95% CI) | Specificity<br>(95% CI) | PPV<br>(95% CI)       | NPV<br>(95% CI)     |
|---------------------------------|-------------------------|-------------------------|-----------------------|---------------------|
| ≥50% are palliative care claims | 24.0 (9.4 to 45.1)      | 100.0 (96.1 to 100.0)   | 100.0 (54.1 to 100.0) | 83.0 (74.8 to 89.5) |
| ≥10% are palliative care claims | 76.0 (54.9 to 90.6)     | 97.8 (92.5 to 99.7)     | 90.5 (69.6 to 98.8)   | 93.8 (87.0 to 97.7) |
| ≥5% are palliative care claims  | 76.0 (54.9 to 90.6)     | 95.7 (89.4 to 98.8)     | 82.6 (61.2 to 95.1)   | 93.7 (86.8 to 97.7) |
| ≥3% are palliative care claims  | 76.0 (54.9 to 90.6)     | 88.2 (79.8 to 93.9)     | 67.9 (47.7 to 84.1)   | 93.2 (85.8 to 97.5) |

PPV, positive predictive value; NPV, negative predictive value

Reference standard: physician survey in which they self-identified themselves as physicians that practice mostly palliative care.

Table 4. Characteristics of family physicians/general practitioners that practice palliative care, as identified by the algorithm.

| Characteristic                            | Non-Palliative Care Physicians | Palliative Care Physicians |                          |                   |
|-------------------------------------------|--------------------------------|----------------------------|--------------------------|-------------------|
|                                           |                                | Overall <sup>1</sup>       | 10% to <50% <sup>2</sup> | ≥50% <sup>2</sup> |
| Total                                     | 9456                           | 276                        | 167                      | 109               |
| Age, mean (SD)                            | 50.4 (11.8)                    | 50.6 (13.1)                | 51.9 (13.7)**            | 48.5 (11.9)       |
| Sex, n (%)                                |                                | *                          |                          |                   |
| Female                                    | 3,665 (38.8%)                  | 135 (48.9%)                | 75 (44.9%)               | 60 (55.0%)        |
| Male                                      | 5,791 (61.2%)                  | 141 (51.1%)                | 92 (55.1%)               | 49 (45.0%)        |
| Practice location, n (%)                  |                                | *                          |                          |                   |
| Urban                                     | 8,250 (87.2%)                  | 265 (96.0%)                | 159 (95.2%)              | 106 (97.2%)       |
| Rural                                     | 1,077 (11.4%)                  | 9 (3.3%)                   | 7 (4.2%)                 | ≤ 5               |
| missing                                   | 129 (1.4%)                     | ≤ 5                        | ≤ 5                      | ≤ 5               |
| Practice location by health region, n (%) |                                | *                          | **                       |                   |
| 1                                         | 358 (3.8%)                     | 7 (2.5%)                   | ≤ 5                      | ≤ 5               |
| 2                                         | 694 (7.3%)                     | 13 (4.7%)                  | 6 (3.6%)                 | 7 (6.4%)          |
| 3                                         | 501 (5.3%)                     | 18 (6.5%)                  | 13 (7.8%)                | ≤ 5               |
| 4                                         | 969 (10.2%)                    | 24 (8.7%)                  | 16 (9.6%)                | 8 (7.3%)          |
| 5                                         | 444 (4.7%)                     | 6 (2.2%)                   | 6 (3.6%)                 | ≤ 5               |
| 6                                         | 687 (7.3%)                     | 17 (6.2%)                  | 10 (6.0%)                | 7 (6.4%)          |
| 7                                         | 1,092 (11.5%)                  | 73 (26.4%)                 | 30 (18.0%)               | 43 (39.4%)        |
| 8                                         | 1,107 (11.7%)                  | 28 (10.1%)                 | 21 (12.6%)               | 7 (6.4%)          |
| 9                                         | 901 (9.5%)                     | 22 (8.0%)                  | 18 (10.8%)               | ≤ 5               |
| 10                                        | 435 (4.6%)                     | 7 (2.5%)                   | 6 (3.6%)                 | ≤ 5               |
| 11                                        | 1,064 (11.3%)                  | 39 (14.1%)                 | 22 (13.2%)               | 17 (15.6%)        |
| 12                                        | 358 (3.8%)                     | 7 (2.5%)                   | ≤ 5                      | ≤ 5               |
| 13                                        | 477 (5.0%)                     | 10 (3.6%)                  | 9 (5.4%)                 | ≤ 5               |
| 14                                        | 240 (2.5%)                     | ≤ 5                        | ≤ 5                      | ≤ 5               |
| missing                                   | 129 (1.4%)                     | ≤ 5                        | ≤ 5                      | ≤ 5               |
| Full time equivalent                      |                                | *                          | **                       |                   |
| 1 or more                                 | 5,908 (62.5%)                  | 118 (42.8%)                | 75 (44.9%)               | 43 (39.4%)        |
| less than 1                               | 3,496 (37.0%)                  | 145 (52.5%)                | 89 (53.3%)               | 56 (51.4%)        |
| missing                                   | 52 (0.5%)                      | 13 (4.7%)                  | ≤ 5                      | 10 (9.2%)         |
| Proportion of palliative care claims      | 0.5%                           | 35.7%                      | 21.2%                    | 82.8%             |

<sup>1</sup>represents all palliative care physicians identified using the 10% algorithm.

<sup>2</sup>represents all palliative care physicians identified using the 10% algorithm, stratified by those with 10% to <50% and ≥50% of all their claims being palliative care claims.

\*represents p<0.05 comparing non-palliative care physicians to palliative care physicians baseline characteristic

\*\*represents p<0.05 comparing 10% to <50% to ≥50% palliative care physicians baseline characteristic

1  
2  
3 Appendix A. List of palliative feecodes used to create algorithm.  
4

5 Final codes included in the algorithm:  
6

7 A901 billed with B997 or B998

8 A902 billed with B997 or B998

9 A945

10 B966

11 B990

12 B992

13 B994

14 B996

15 B997

16 B998

17 C882

18 C982

19 C945 billed with C882 or C945 or C982

20 E083

21 K015

22 K023

23 K700

24 W872

25 W882

26 G511

27 G512

28  
29  
30  
31  
32 Feecodes considered, but excluded because there was no billing activity  
33

34  
35 K001

36 W972

37 W982

38 Z327

39 Z361

40 Z362

41 G063

42 G064  
43  
44  
45  
46  
47  
48  
49  
50  
51  
52  
53  
54  
55  
56  
57  
58  
59  
60
